# Supplementary material
Source: PubMed Central journal article supplement (PMC2964982)
Supplement: JCI43271sd.pdf [file JCI43271sd.pdf]

Supplementary Figure 1

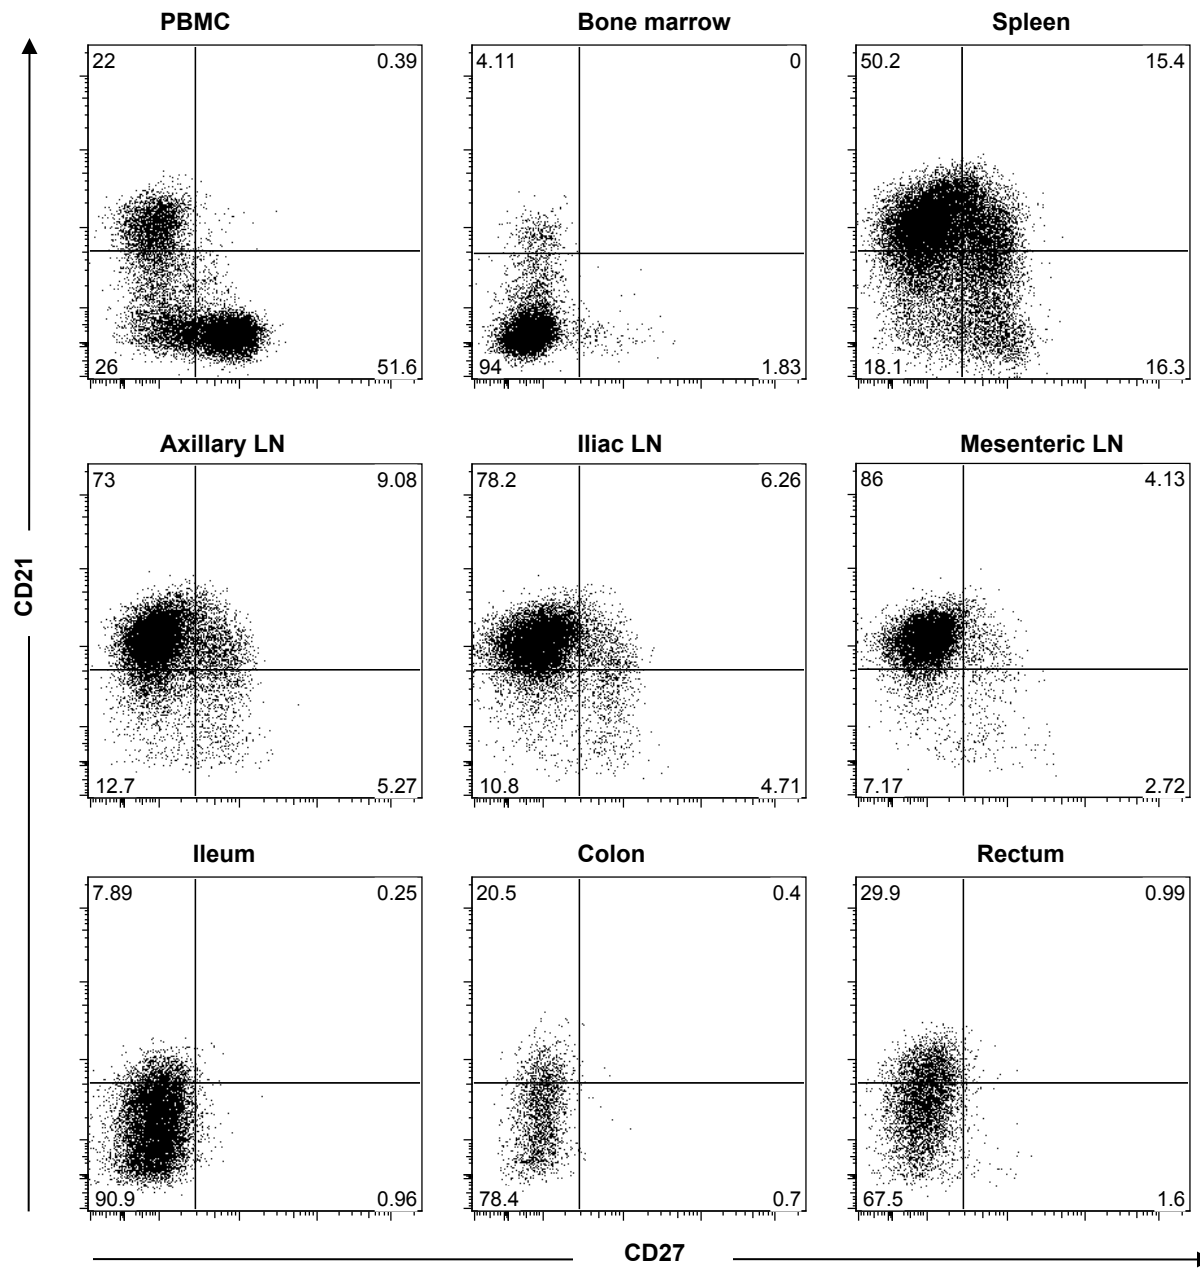

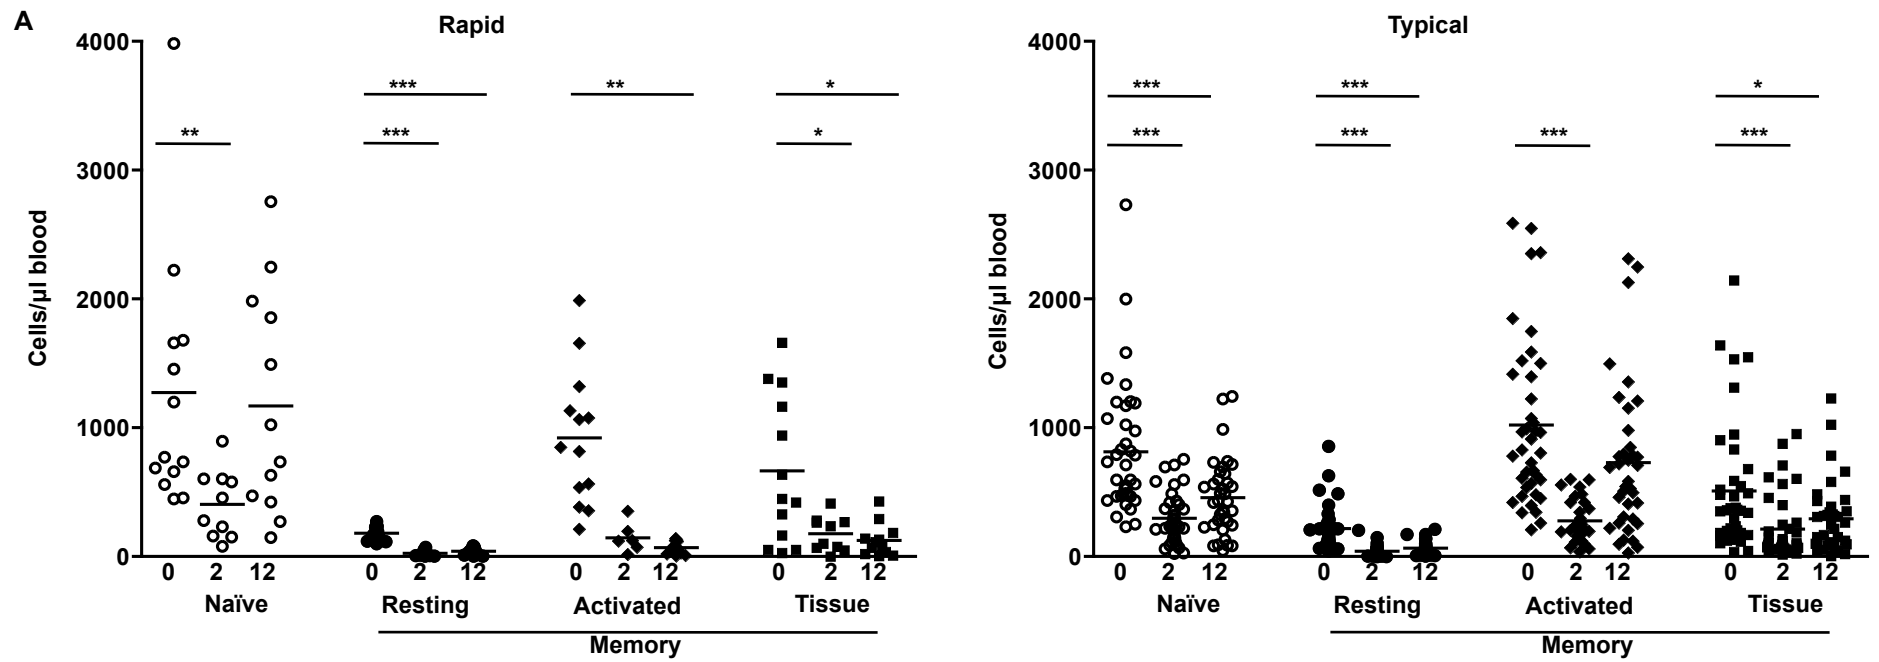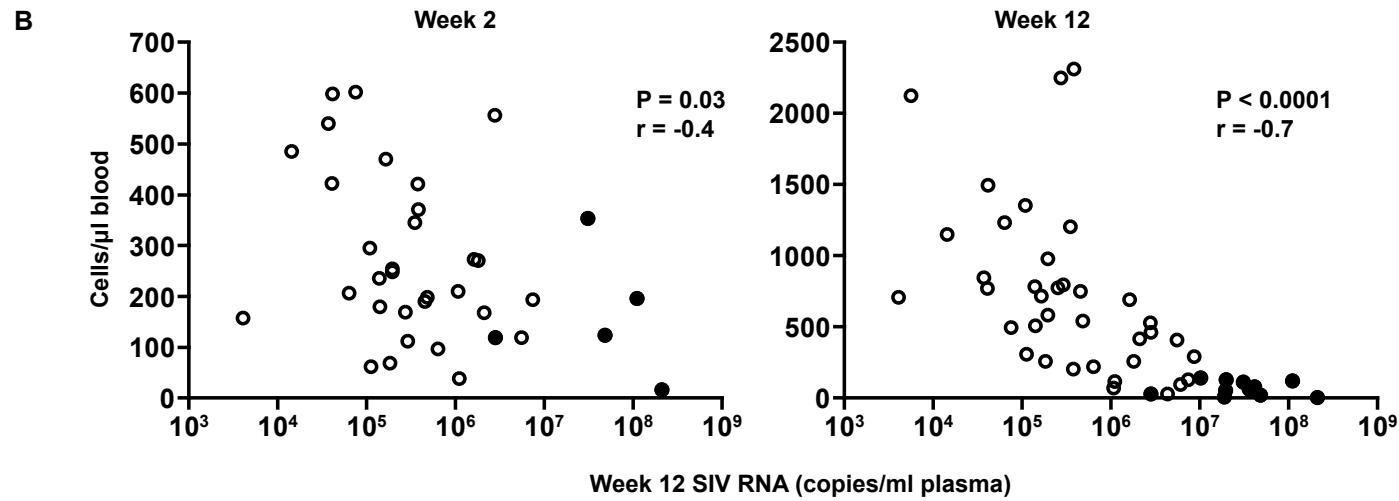

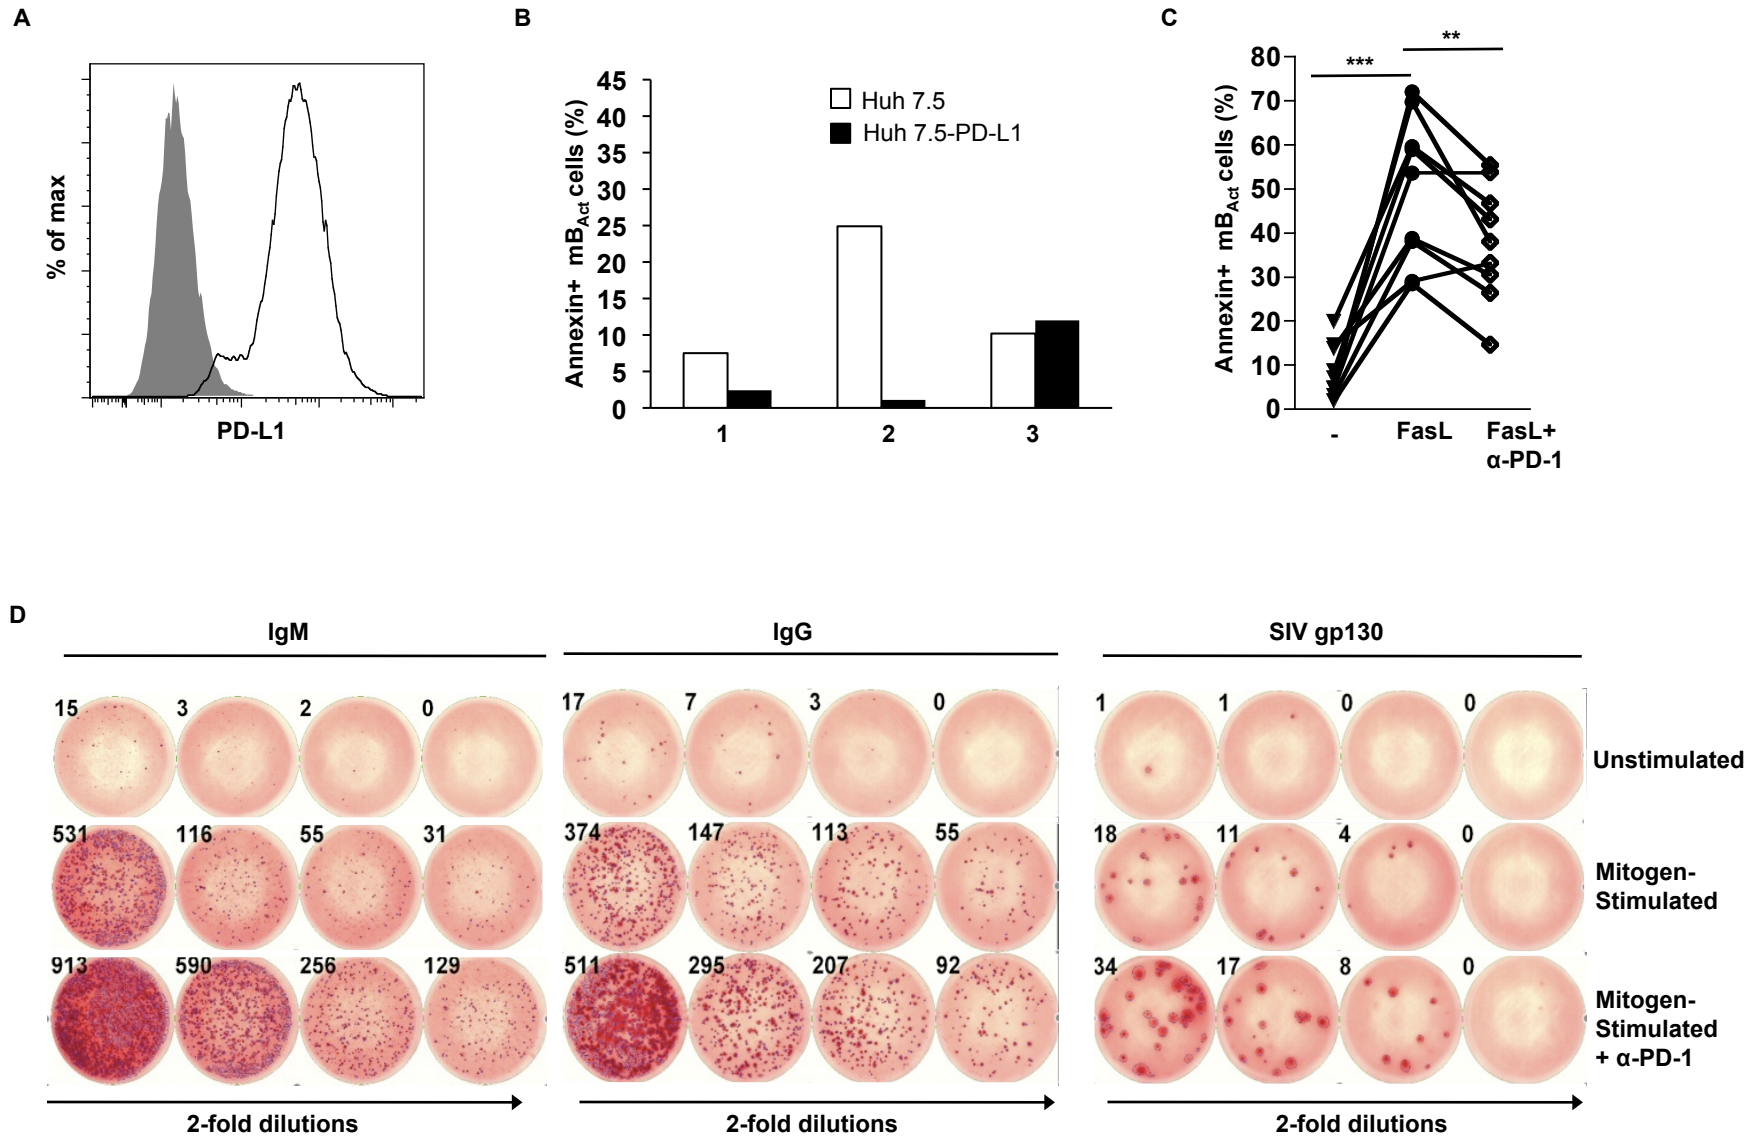

**Supplementary Figure 1.** Representative flow cytometric dot plots showing distribution of B cell subsets in tissues of an uninfected rhesus macaque. Cells were gated on CD20<sup>+</sup> cells. Numbers represent proportion of each subset as a percentage of CD20<sup>+</sup> cells.

**Supplementary Figure 2. (A).** Absolute counts of B cell subsets in rapid progressors (n=13) and typical progressors (n = 39) pre- (Week 0) and post- (Weeks 2 and 12) SIV infection. Each data point represents an individual animal, and horizontal lines represent medians. **(B)** Correlations between set-point viral load and absolute numbers of mB<sub>Act</sub> cells at 2 or 12 weeks post SIV infection; filled and open symbols represent rapid and typical progressors, respectively. \*, P < 0.05; \*\*, P < 0.01; \*\*\*, P < 0.001.

**Supplementary Figure 3. (A)** Representative FACS histogram plots demonstrating the expression of PD-L1 on Huh-7.5 (closed) and Huh-7.5.PD-L1 (open) cells. **(B)** Summary of Annexin-V expression on mB<sub>Act</sub> cells of SIV<sup>-</sup> rhesus macaques (n = 3) following culture with Huh 7.5 or Huh 7.5-PD-L1 cells. **(C)** PBMC were purified from 9 SIV-infected animals and cultured for 24hrs in medium only, in the presence of rFasL or in the presence of rFasL + anti-PD-1 blocking Ab. Following culture, cells were stained for Annexin-V on different B cell subsets. **(D)** Representative ELISpots for total IgM, total IgG and SIV Env gp130-specific IgG under 3 conditions: unstimulated (medium only), stimulated (mitogens only) and stimulated + anti-PD-1 blocking Ab. Each spot represents an individual Ab-secreting cell. \*, P < 0.05; \*\*, P < 0.01; \*\*\*, P < 0.001.

**Supplementary Table 1.** Rapid progressor non-SIV infections

| <b>Animal ID</b> | <b>Month 1</b> | <b>Month 2</b> | <b>Month 3</b> | <b>Month 4</b> | <b>Month 5</b> | <b>Month 6</b> |
|------------------|----------------|----------------|----------------|----------------|----------------|----------------|
| <b>RP 1</b>      | 1              |                | 3              |                | 6              | 6              |
| <b>RP 2</b>      |                |                |                |                | 1, 4           | 1, 4, 13       |
| <b>RP 3</b>      | 2              | 1, 2           |                |                | 1, 6           | 6, 13          |
| <b>RP 4</b>      |                | 6              | 6, 13          | 1, 11          |                |                |
| <b>RP 5</b>      |                |                |                |                |                |                |
| <b>RP 6</b>      |                |                |                |                | 6              | 6              |
| <b>RP 7</b>      |                |                |                | 1, 4, 6        | 8              |                |
| <b>RP 8</b>      |                |                | 1, 3, 6        |                |                |                |
| <b>RP 9</b>      |                |                | 1, 5           | 5, 6           | 6              | 6              |
| <b>RP 10</b>     |                |                | 3,4            | 1              |                |                |
| <b>RP 11</b>     |                |                |                | 2              | 6              | 6              |
| <b>RP 12</b>     |                |                | 1, 5           | 1              | 5              | 5, 6           |
| <b>RP 13</b>     |                |                | 1, 6, 12       | 1, 6, 12       |                |                |

*Campylobacter spp*-1, *Shigella*-2, *Trichomonas*-3, whipworms-4, enteropathogenic *E.coli*-5, diarrhea-6, trauma-7, abscess-8, eye problems-9, *Candida*-10, pain-11, *Giardia*-12, anemia-13, unknown-14

**Supplementary Table 2.** Typical progressor non-SIV infections

| Animal ID | Month 1 | Month 2 | Month 3 | Month 4 | Month 5 | Month 6      |
|-----------|---------|---------|---------|---------|---------|--------------|
| TP 1      |         |         |         |         |         |              |
| TP 2      |         |         |         | 1       |         |              |
| TP 3      |         |         |         |         |         |              |
| TP 4      |         |         |         |         |         |              |
| TP 5      |         |         |         |         |         |              |
| TP 6      |         |         |         |         |         |              |
| TP 7      |         |         |         |         |         |              |
| TP 8      |         |         |         |         |         |              |
| TP 9      |         |         |         |         |         |              |
| TP 10     |         |         |         |         |         |              |
| TP 11     |         | 3       |         |         |         |              |
| TP 12     |         | 3       |         | 6       | 6       | 6            |
| TP 13     |         |         |         | 3       | 3, 6    | 4            |
| TP 14     |         |         |         |         |         |              |
| TP 15     |         |         |         |         |         |              |
| TP 16     | 6       |         |         |         |         |              |
| IP 17     |         |         |         |         |         |              |
| TP 18     |         |         |         |         | 7       |              |
| TP 19     | 1       |         |         |         |         |              |
| TP 20     |         |         |         |         |         |              |
| TP 21     |         |         | 1       |         |         |              |
| TP 22     |         |         |         | 2, 3    |         |              |
| TP 23     |         |         |         |         |         |              |
| TP 24     |         |         | 3       | 3       |         | 2            |
| TP 25     |         |         |         | 5, 6    | 6       | 1, 6, 10, 11 |
| TP 26     |         |         |         |         | 7, 11   | 7, 11        |
| TP 27     |         |         |         |         |         |              |
| TP 28     |         |         | 12      |         |         |              |
| TP 29     |         |         |         |         |         |              |
| TP 30     |         |         |         |         | 2, 3    | 2, 3         |
| TP 31     |         |         |         |         |         |              |
| TP 32     |         |         |         |         |         |              |
| TP 33     |         |         |         | 6       | 5, 6    | 6            |
| TP 34     |         |         |         |         |         |              |
| TP 35     |         |         |         | 6       | 6       |              |
| TP 36     |         |         |         |         |         | 1            |
| TP 37     |         |         |         |         |         |              |
| TP 38     | 2       |         |         |         | 6       | 1            |
| TP 39     |         |         |         |         |         |              |

*Campylobacter spp*-1, *Shigella*-2, *Trichomonas*-3, whipworms-4, enteropathogenic *E.coli*-5, diarrhea-6, trauma-7, abscess-8, eye problems-9, *Candida*-10, pain-11, *Giardia*-12, anemia-13, unknown-14

**Supplementary Table 3.** Statistical tests

| <b>Figure</b>                     | <b>Statistical test used</b>                   |
|-----------------------------------|------------------------------------------------|
| <b>1B</b>                         | t-test                                         |
| <b>2C</b>                         | Wilcoxon signed rank test                      |
| <b>2D</b>                         | Paired t-test                                  |
| <b>3A</b>                         | t-test                                         |
| <b>3B</b>                         | Pearson's product moment correlation           |
| <b>3C (box plots)</b>             | t-test (Wk2) and Wilcoxon rank sum test (Wk12) |
| <b>3D (box plots)</b>             | Wilcoxon rank sum test                         |
| <b>3E (box plots)</b>             | t-test (Wk2) and Wilcoxon rank sum test (Wk12) |
| <b>3C, D and E (Correlations)</b> | Pearson's product moment correlation           |
| <b>4C</b>                         | Wilcoxon signed rank test                      |
| <b>5C</b>                         | Paired t-test                                  |
| <b>6B</b>                         | Paired t-test                                  |
| <b>6D</b>                         | t-test (IgM) and Wilcoxon rank-sum test (IgG)  |
| <b>Supplementary Figure 2A</b>    | Paired t-test                                  |
| <b>Supplementary Figure 2B</b>    | Pearson's product moment correlation           |
| <b>Supplementary Figure 3C</b>    | Paired t-test                                  |
